# Supplementary material for: An ionic liquid composed of purely functional sensing molecules: a colorimetrically calcium responsive ionic liquid
Source: Royal Society of Chemistry journal article supplement (doi:10.1039/c9an01769k), 2019-01-01
Supplement: c9an01769k1.pdf [file c9an01769k1.pdf]

## Electronic Supporting Information

Ionic liquid composed of purely functional sensing molecules:

Colorimetrically calcium responsive ionic liquid

Yusuke Niwa, Tatsumi Mizuta, Kenji Sueyoshi, Tatsuro Endo, Hideaki Hisamoto

*Department of Applied Chemistry, Graduate School of Engineering, Osaka Prefecture University*

*1-1 Gakuencho, Nakaku, Sakai, Osaka 599-8531 Japan. E-mail: hisamoto@chem.osakafu-u.ac.jp*

## Experimental

### 1. Materials

Bis(4-n-octylphenyl)phosphate calcium salt (product name: HDOPP, abbreviated here as  $[\text{OP}_2\text{P}]_2\text{Ca}$ ) and di-n-octyl phenyl phosphonate (DOPP) were purchased from DOJINDO LABORATORIES (Tokyo, Japan). Dodecyl bromide, piperidine, lepidine, 4-methylpyridine, and 3, 5-di-*tert*-butyl-4-hydroxybenzaldehyde were purchased from Tokyo Chemical Industry (Tokyo, Japan). Dichloromethane (DCM), tetrahydrofuran (THF) and ethanol were purchased from Kanto Chemical Co. (Tokyo, Japan). Phosphoric acid ( $\text{H}_3\text{PO}_4$ ), sodium hydroxide (NaOH), hydrochloric acid (HCl), sodium chloride (NaCl), potassium chloride (KCl), magnesium chloride hexahydrate ( $\text{MgCl}_2 \cdot 6\text{H}_2\text{O}$ ), calcium chloride anhydrous ( $\text{CaCl}_2$ ), and disodium sulfate ( $\text{Na}_2\text{SO}_4$ ) were purchased from Fujifilm Wako Pure Chemical Corporation (Osaka, Japan).

### 2. Preparation of colorimetrically calcium responsive ionic liquid and membrane

#### 2.1 Synthesis of KD-M13 and KD-M11

KD-M13 and KD-M11 were synthesized according to a previously reported method.<sup>1</sup>

#### 2.2 Synthesis of $[\text{KD-M13}][\text{OP}_2\text{P}]$ and $[\text{KD-M11}][\text{OP}_2\text{P}]$

KD-M13 (250 mg, 462  $\mu\text{mol}$ ) was dissolved to 50 mL of  $\text{CH}_2\text{Cl}_2$  and 20 mL of 1 M  $\text{H}_3\text{PO}_4$  was added to this solution. Then,  $[\text{OP}_2\text{P}]_2\text{Ca}$  (228 mg, 231  $\mu\text{mol}$ ) was added to initiate the ion-exchange reaction, and the mixture was stirred overnight at room temperature. The resulting solution was washed several times with 1 M  $\text{H}_3\text{PO}_4$  as the aqueous phase to remove residual calcium ions. After the organic phase was dried using  $\text{Na}_2\text{SO}_4$  and evaporated, a liquid product was obtained. For  $[\text{KD-M11}][\text{OP}_2\text{P}]$ , exactly the same procedure to  $[\text{KD-M13}][\text{OP}_2\text{P}]$  synthesis was conducted by using KD-M11 instead of KD-M13. Product was obtained as an orange solid.

#### 2.3 Preparation of PVC membrane and a neat membrane

A mixture of PVC (4.2 mg) and [KD-M13][OP<sub>2</sub>P] (30.6 mg; ca. 1 : 9 wt/wt) was dissolved in THF (1206 mg). The prepared THF solution was spin-coated (1600 rpm, 20 s) onto a PET film. The thickness of the PVC membrane was  $240 \pm 10$  nm, as determined by using a laser microscope (VK-8510, KEYENCE, Osaka, Japan).

The neat membrane was prepared by a similar process but without PVC. [KD-M13][OP<sub>2</sub>P] (36.7 mg) was dissolved in THF (1241 mg) and spin-coated in a similar manner. The thickness of the neat membrane was  $170 \pm 20$  nm.

## 2.4 Synthesis of [KD-M13][N(SO<sub>2</sub>R<sub>f4</sub>)<sub>2</sub>]

Sodium bis(nonafluorobutylsulfonyl)imide (NaN(SO<sub>2</sub>R<sub>f4</sub>)<sub>2</sub>) (131 mg, 0.22 mmol) were added to the KD-M13 (114 mg, 0.22 mmol) in 50 mL of dichloromethane. To this solution, 1 M H<sub>3</sub>PO<sub>4</sub> aqueous solution was added and stirred for 1 hour at room temperature. Then, the organic layer was washed several times with distilled water and dried with Na<sub>2</sub>SO<sub>4</sub>. After evaporation of the solvent, orange liquid was obtained.

## 2.5 Preparation of PVC membrane composed of [KD-M13][N(SO<sub>2</sub>R<sub>f4</sub>)<sub>2</sub>]

PVC (3.7 mg) and [KD-M13][N(SO<sub>2</sub>R<sub>f4</sub>)<sub>2</sub>] (32.1 mg) were dissolved in THF (1803.4 mg). Prepared THF cocktail was spin-coated on PET film (1600 rpm, 20 s) (Thickness of membrane :  $230 \pm 20$  nm).

## 3. Preparation of conventional PVC membrane

PVC (31.4 mg), KD-M13 (2.6 mg), [OP<sub>2</sub>P]<sub>2</sub>Ca (2.6 mg), and DOPP(64.4 mg) were dissolved in THF (820 mg). The prepared THF solution was spin-coated (1600 rpm, 20 s) onto a PET film. The thickness of the conventional PVC membrane was  $2000 \pm 40$  nm.

## 4. Differential scanning calorimetry (DSC)

DSC measurements were carried out using a Hitachi High-Tech Science DSC7020 apparatus with liquid nitrogen cooling accessory under nitrogen gas flow. Glass transition temperatures ( $T_g$ ) of [KD-M13][OP<sub>2</sub>P] and melting points of KD-M13 and [OP<sub>2</sub>P]<sub>2</sub>Ca were determined by the first heating scan in the DSC measurements. The scan rate for [KD-M13][OP<sub>2</sub>P] was 5 °C min<sup>-1</sup>, and that for KD-M13 and [OP<sub>2</sub>P]<sub>2</sub>Ca was 10 °C min<sup>-1</sup>.

# Additional Supporting Data

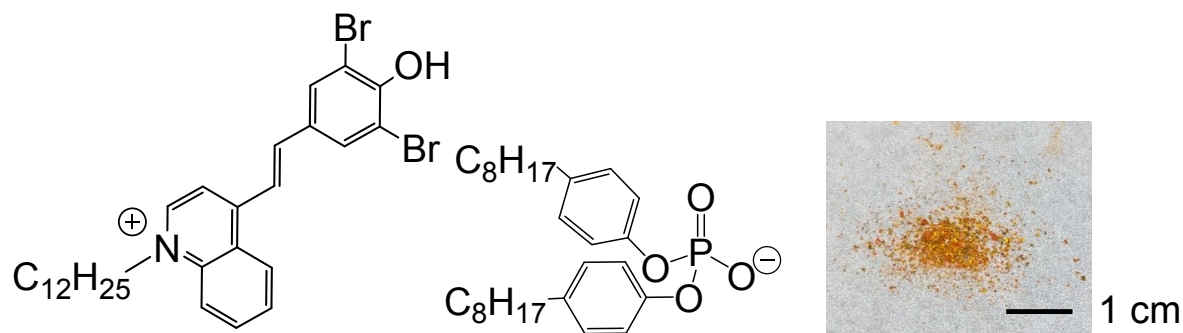

**Fig. S1.** Structure of [KD-M11][OP<sub>2</sub>P], and [KD-M11][OP<sub>2</sub>P] at 25 °C

appeared as an orange solid (scale bar represents 1 cm)

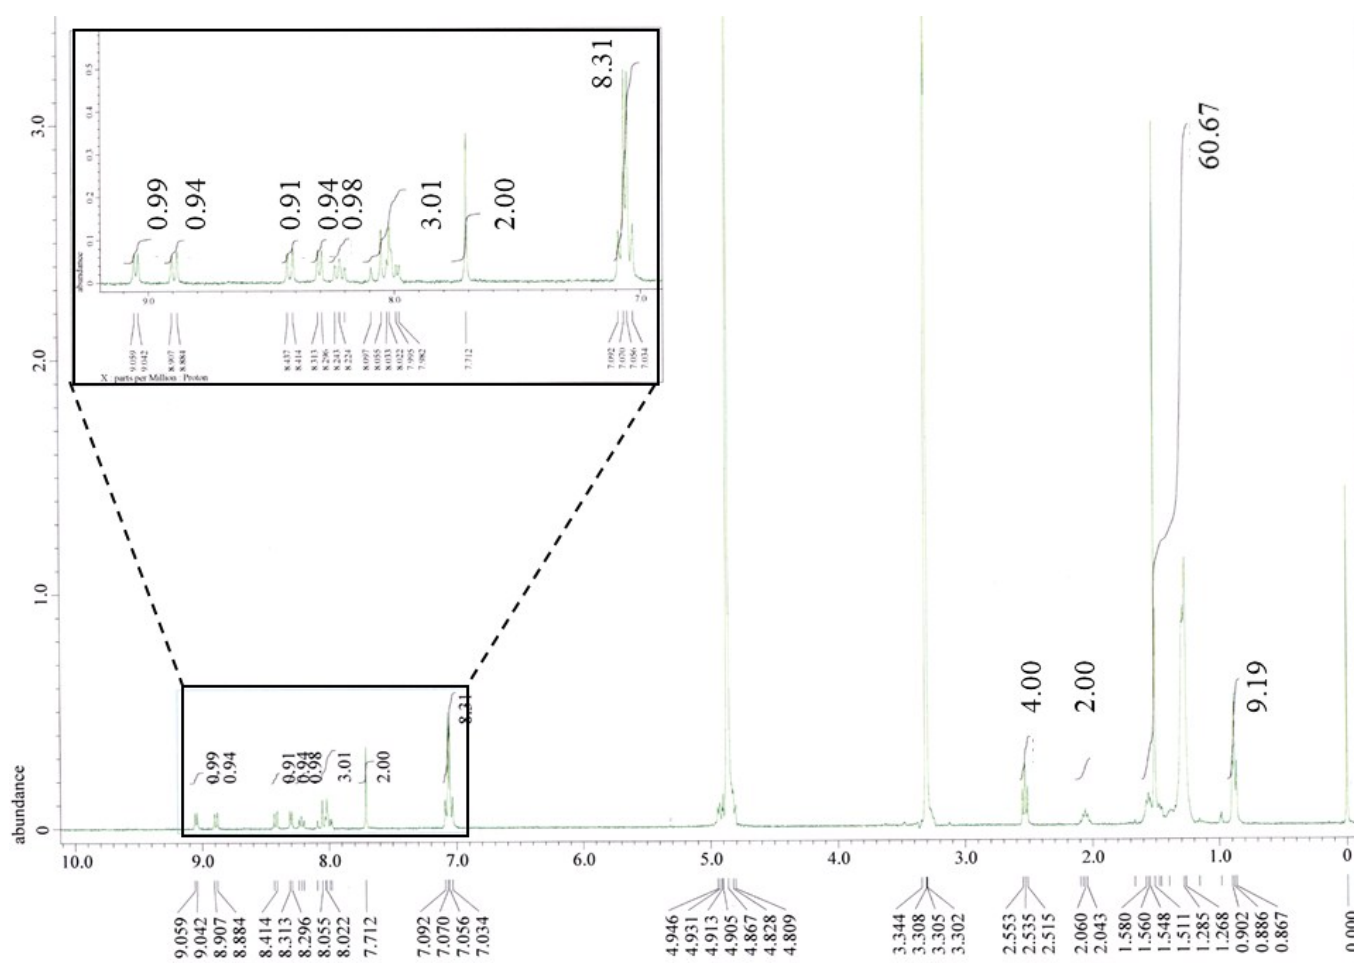

<sup>1</sup>H NMR (400, MHz, CD<sub>3</sub>OD) δ 0.86 (m, 9H), 1.24–1.65 (m, 60H), 2.05 (m, 2H), 2.51 (t, 4H), 7.01–7.07 (d, 8H), 7.70 (s, 2H), 7.90–8.10 (m, 3H), 8.20 (t, 1), 8.28 (d, 1H), 8.41 (d, 1H), 8.89 (d, 1H), 9.03 (d, 1H)

**Fig. S2.** <sup>1</sup>H NMR spectrum of [KD-M13][OP<sub>2</sub>P]

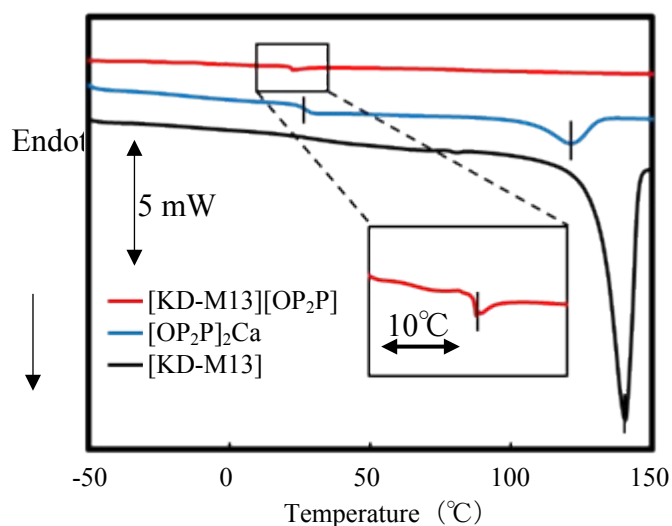

**Fig. S3.** Differential scanning calorimetry thermograms of [KD-M13][OP<sub>2</sub>P] (scan rate : 5 °C/min, red), [OP<sub>2</sub>P]Ca (scan rate : 10 °C/min, blue) and KD-M13 (scan rate : 10 °C/min, black). ([KD-M13][OP<sub>2</sub>P] :  $T_m = 22$  (°C), [OP<sub>2</sub>P]Ca :  $T_g = 27$  (°C),  $T_m = 122$  (°C), KD-M13 :  $T_m = 140$  (°C))

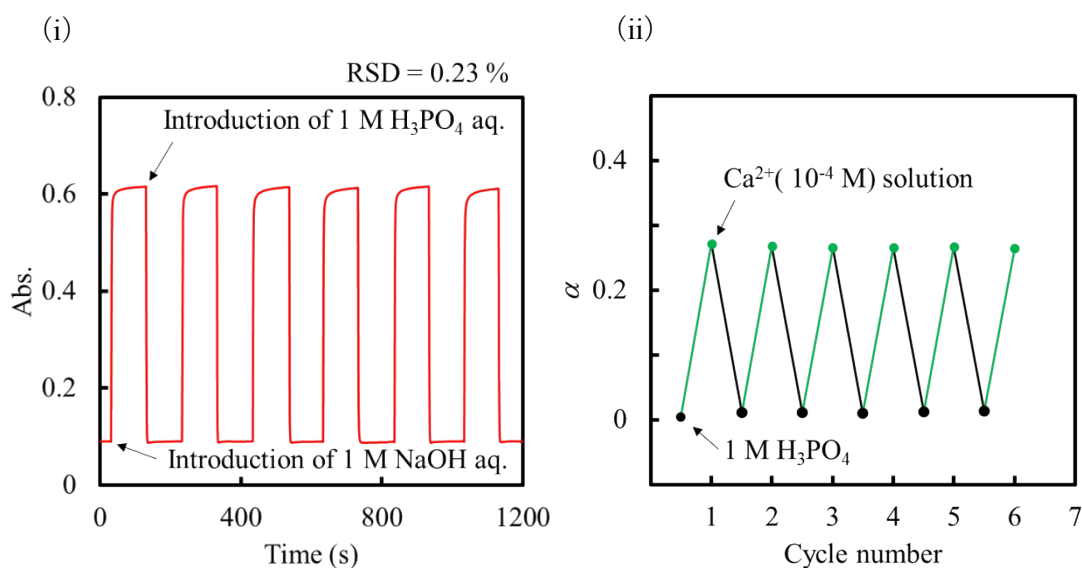

**Fig. S4.** Reversibility of the absorbance responses of PVC membrane at 630 nm upon introducing (i) 1 M H<sub>3</sub>PO<sub>4</sub> aqueous solution and 1 M NaOH aqueous solution (ii) 1 M H<sub>3</sub>PO<sub>4</sub> aqueous solution and 10<sup>-4</sup> M calcium aqueous solution.

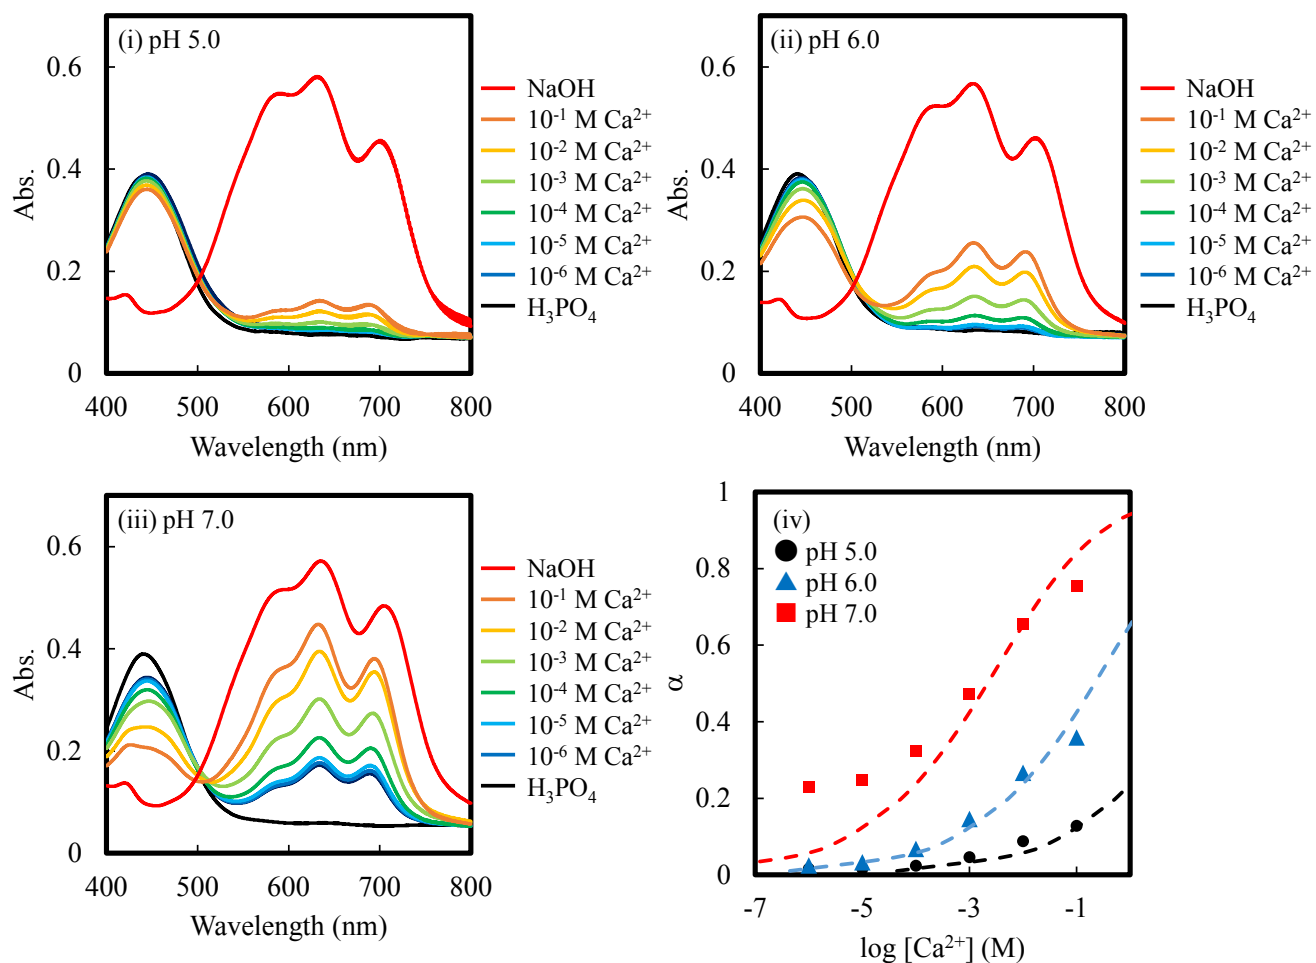

**Fig. S5.** Absorption spectra of [KD-M13][OP<sub>2</sub>P]-based PVC membrane responding to several concentrations of calcium ion contained in (i) 50 mM AcOH-AcONa buffer (pH 5.0), (ii) 50 mM AcOH-AcONa buffer (pH 6.0), and (iii) 50 mM Tris-HCl buffer (pH 7.0). (iv) Response curves for each pH condition.

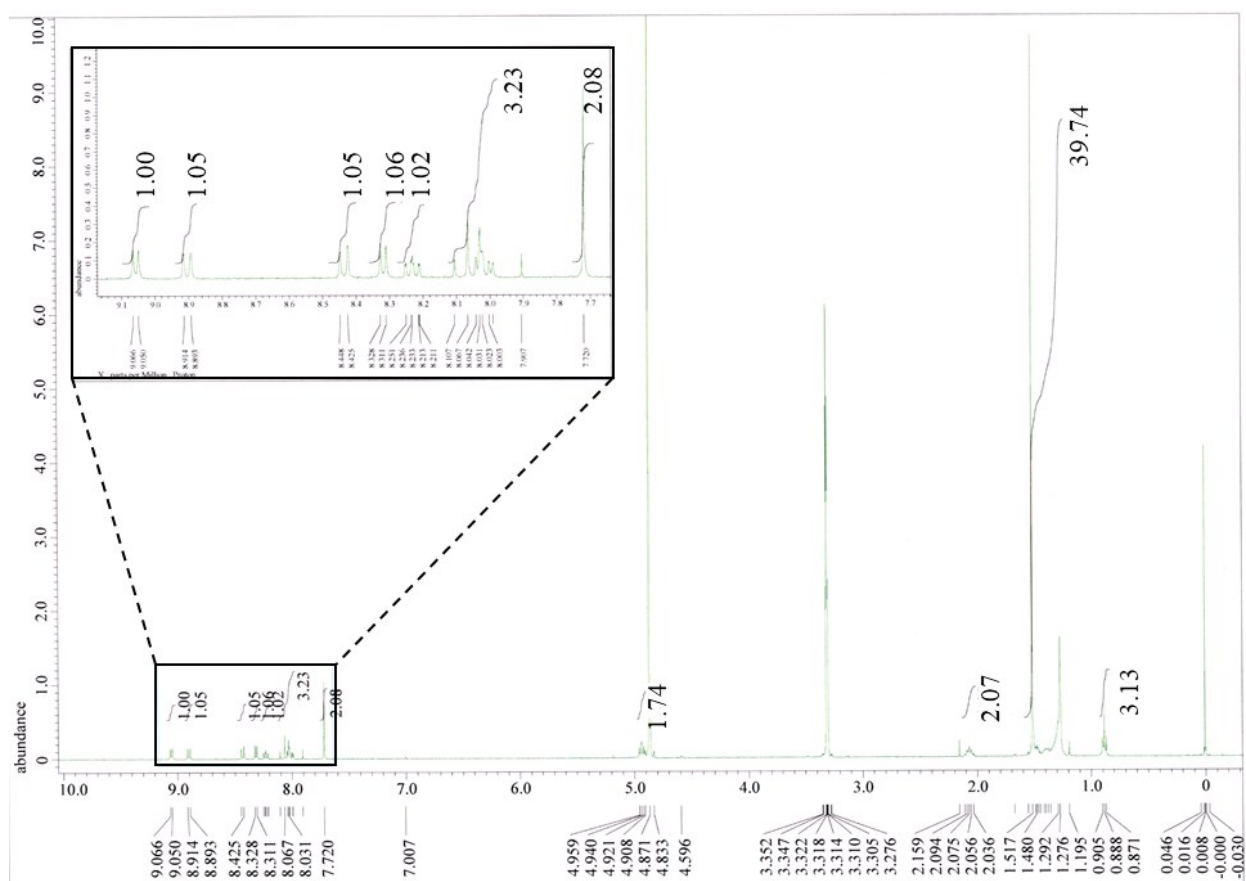

$^1\text{H}$  NMR (400 MHz,  $\text{CD}_3\text{OD}$ )  $\delta$  0.88 (t, 3H), 1.24~1.65 (m, 36H), 2.08 (tt, 2H), 4.94 (t, 2H), 7.72 (s, 2H), 8.00~8.04 (m, 2H), 8.08 (d, 1H), 8.23 (td, 1H), 8.32 (d, 1H), 8.43 (d, 1H), 8.90 (d, 1H), 9.06 (d, 1H)

**Fig. S6.**  $^1\text{H}$  NMR spectrum of [KD-M13]  $[\text{N}(\text{SO}_2\text{Rf}_4)_2]$

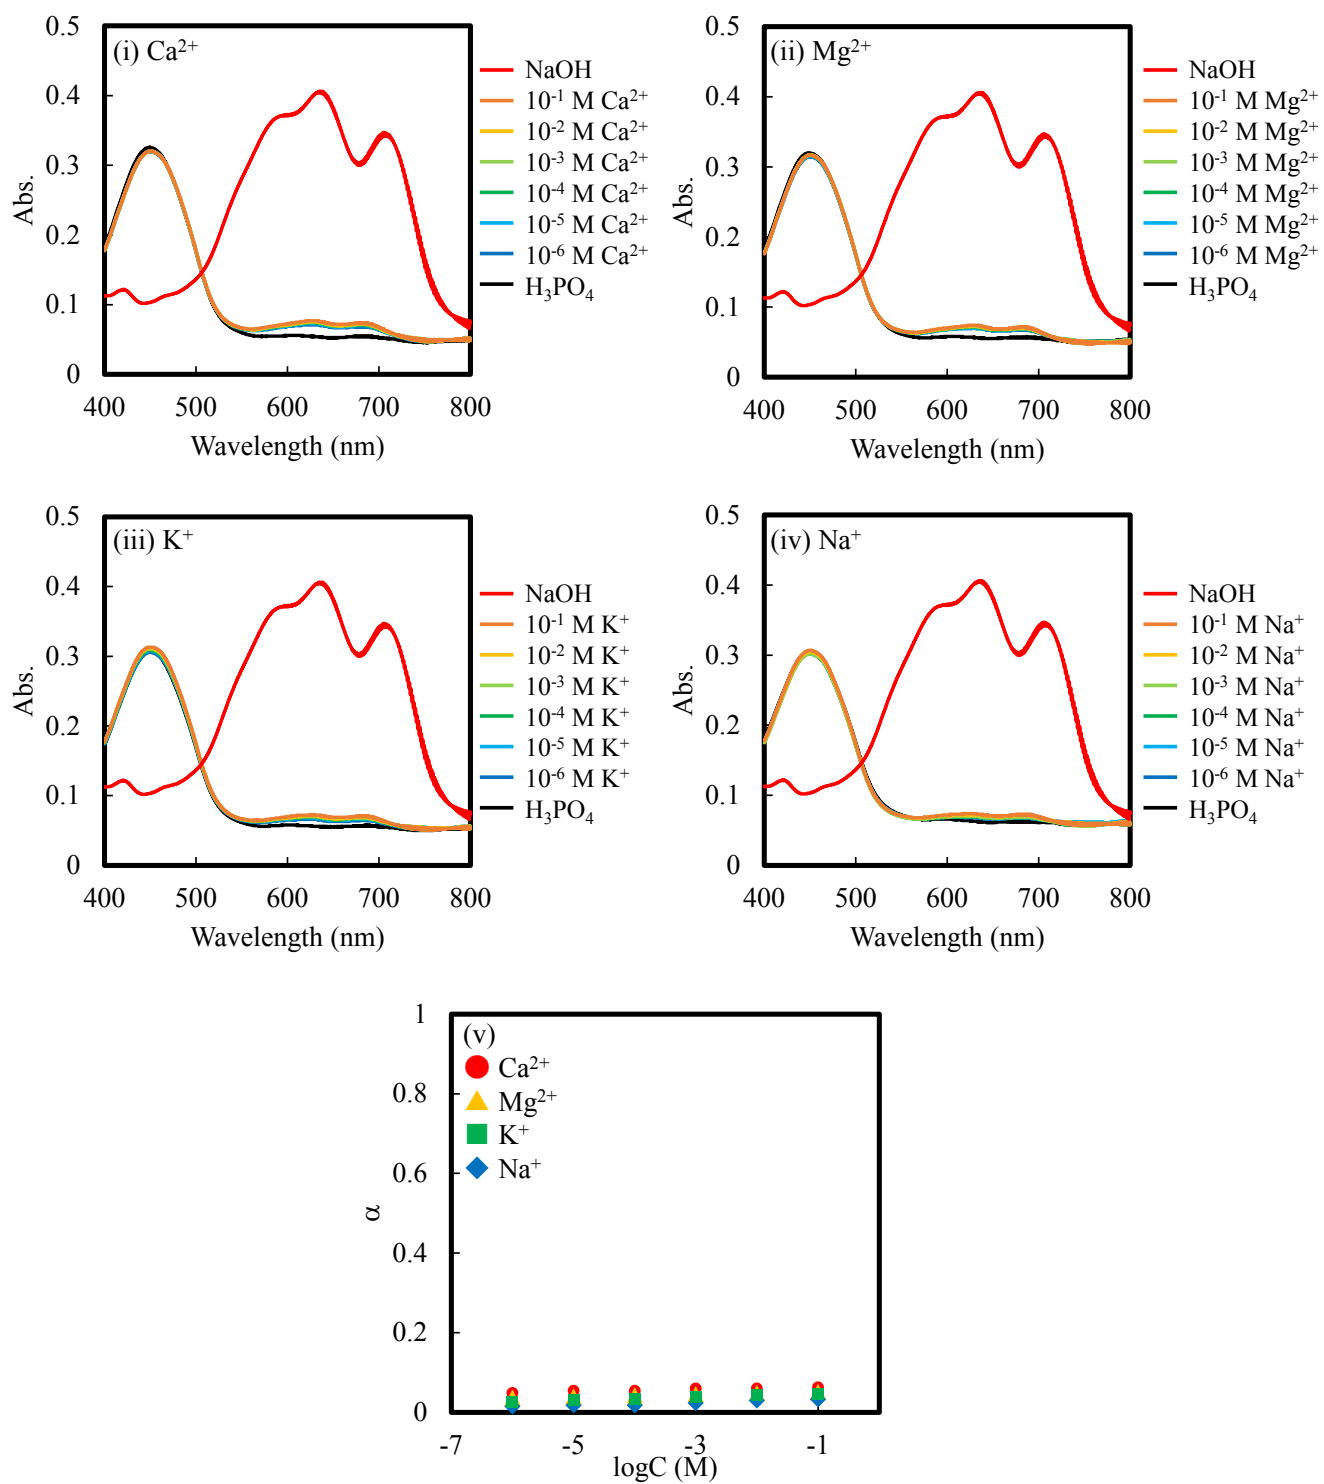

**Fig. S7.** Absorption spectra of [KD-M13][N(SO<sub>2</sub>Rf<sub>4</sub>)<sub>2</sub>] PVC membranes for various cation solutions

((i) Ca<sup>2+</sup>, (ii) Mg<sup>2+</sup>, (iii) K<sup>+</sup>, (iv) Na<sup>+</sup>), and response curves (v).

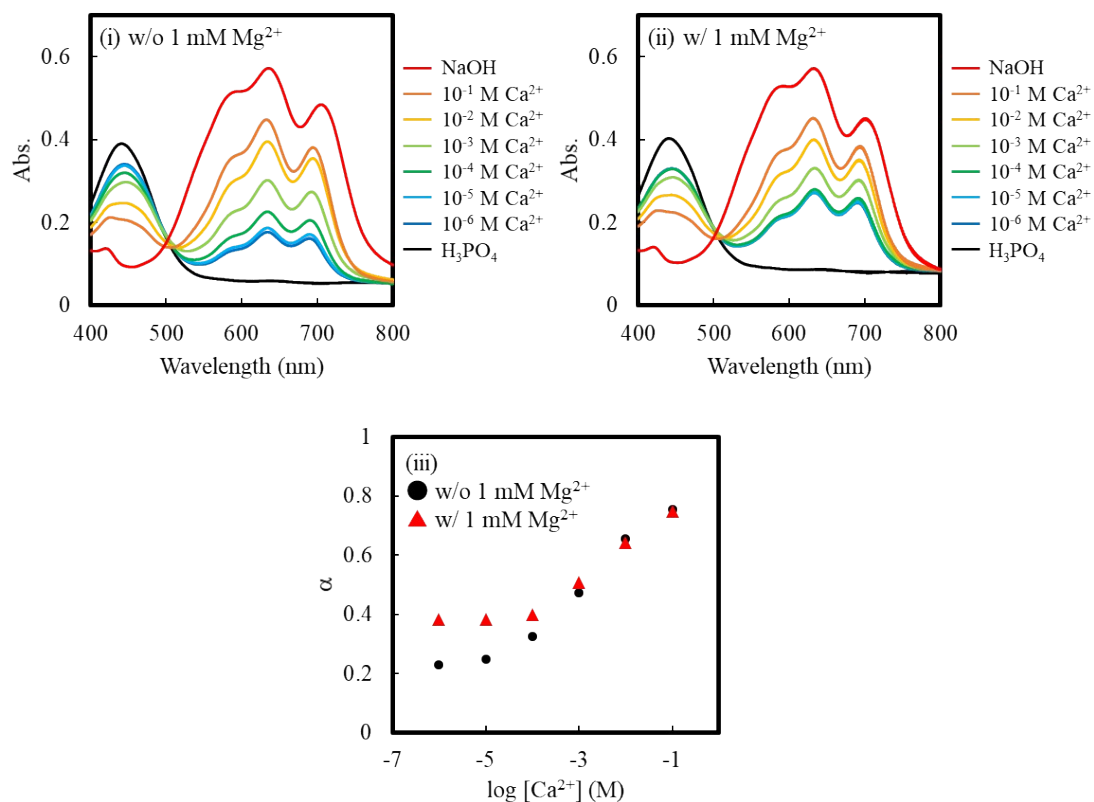

**Fig. S8.** Absorption spectra of [KD-M13][OP<sub>2</sub>P]-based PVC membrane responding to several concentrations of Ca<sup>2+</sup> contained in 50 mM Tris-HCl buffer (pH 7.0) (i) without 1mM Mg<sup>2+</sup> and (ii) with 1 mM Mg<sup>2+</sup>. (iii) Response curves for each condition.

**Table S1** 95% Response time\* of [KD-M13][OP<sub>2</sub>P]-based PVC membrane (this work)and conventional PVC membrane for Ca<sup>2+</sup>

| Ca <sup>2+</sup> (M)  | 10 <sup>-6</sup> | 10 <sup>-5</sup> | 10 <sup>-4</sup> | 10 <sup>-3</sup> | 10 <sup>-2</sup> | 10 <sup>-1</sup> |
|-----------------------|------------------|------------------|------------------|------------------|------------------|------------------|
| Conventional membrane | 50 s             | 40 s             | 16 s             | 10 s             | 8.5 s            | 8.0 s            |
| This work             | 48 s             | 41 s             | 35 s             | 38 s             | 98 s             | 914 s            |

\* For the response time measurement, prepared membranes were first immersed into 1M phosphoric acid solution, followed by equilibration with buffer solution. Then, each Ca<sup>2+</sup> sample solution was introduced into flow cell to obtain 95% response time.

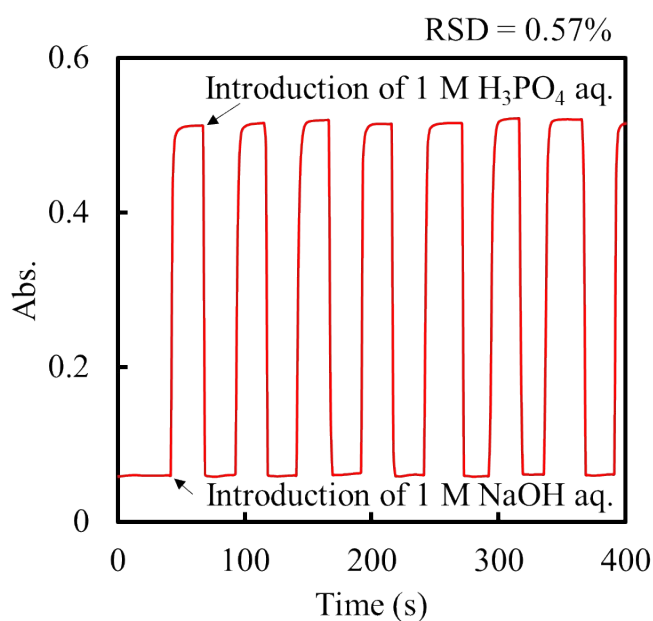**Fig. S9.** Reversibility of the absorbance responses of neat membrane at 635 nm upon introducing 1 M H<sub>3</sub>PO<sub>4</sub> and 1 M NaOH aqueous solution

1. H. Hisamoto, H. Tohma, T. Yamada, K. Yamauchi, D. Siswanta, N. Yoshioka and K. Suzuki, *Anal. Chim. Acta*, **1998**, 373, 271–289.
